# Supplementary material for: Landscape genetic structure and evolutionary genetics of insecticide resistance gene mutations in Anopheles sinensis
Source: PubMed Central journal article supplement (PMC4842280; doi:10.1186/s13071-016-1513-6), 2016-04-23
Supplement: 13071_2016_1513_MOESM2_ESM.pdf [file 13071_2016_1513_MOESM2_ESM.pdf]

**a:**

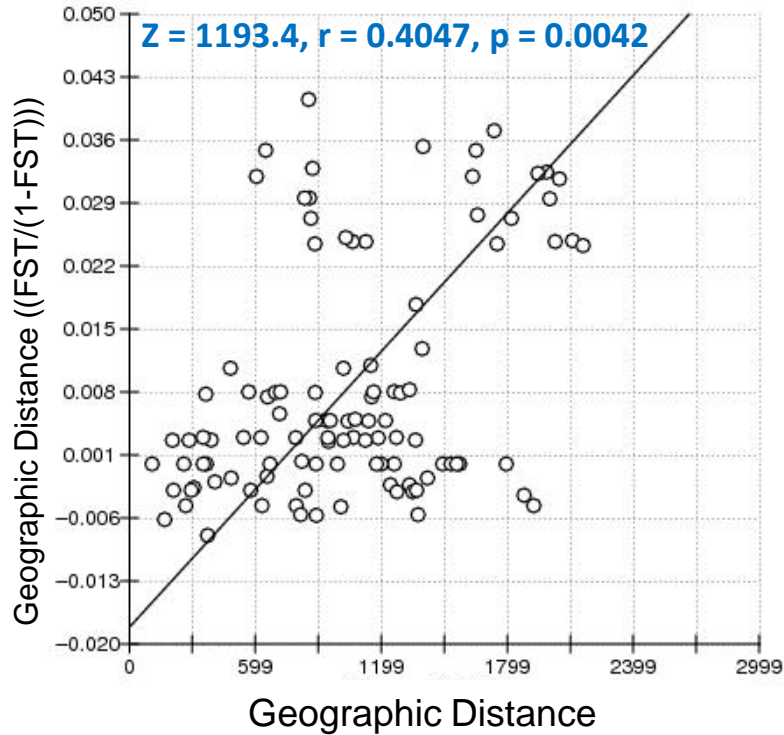

**b:**

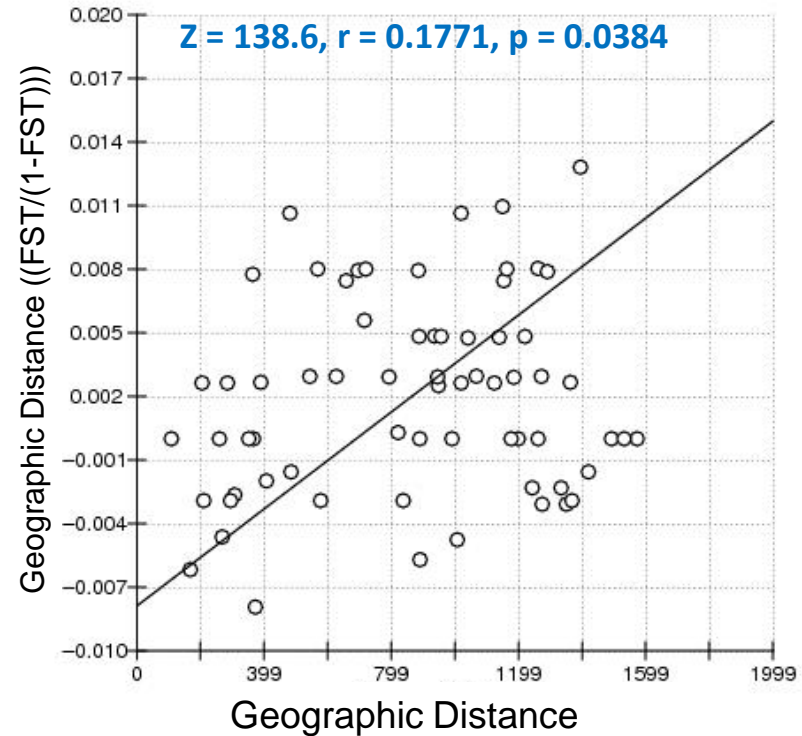

**Additional file 2: Figure S1.** Isolation by distance, relationship between geographical and genetic distances based on mtDNA sequences in the *Anopheles sinensis* populations. **a**, All populations; **b**, All populations without Yunnan samples.

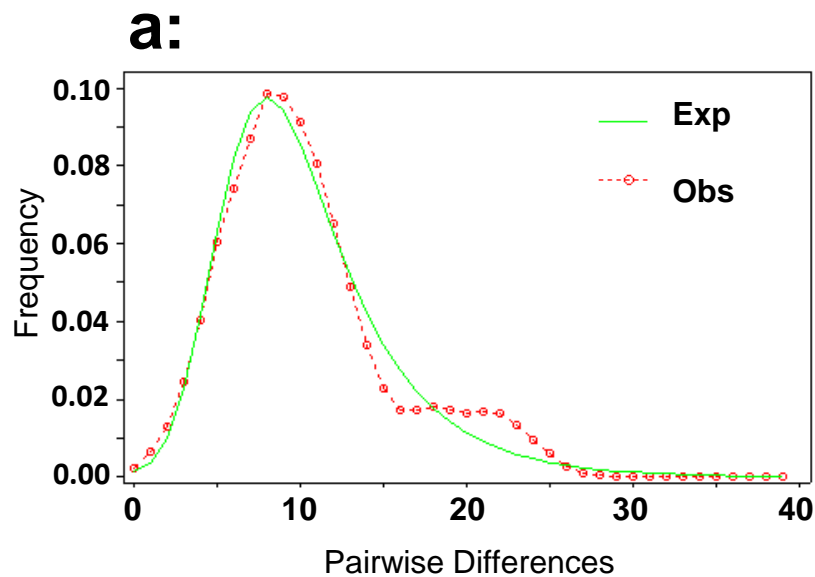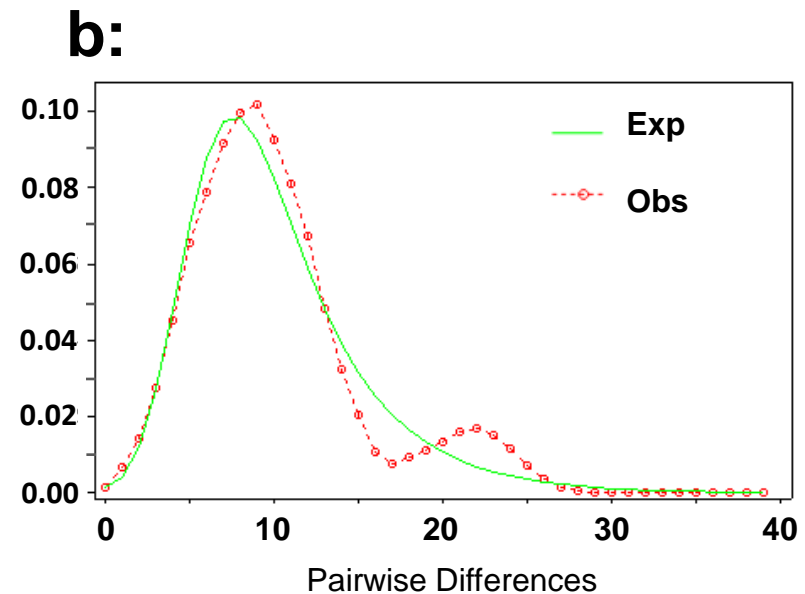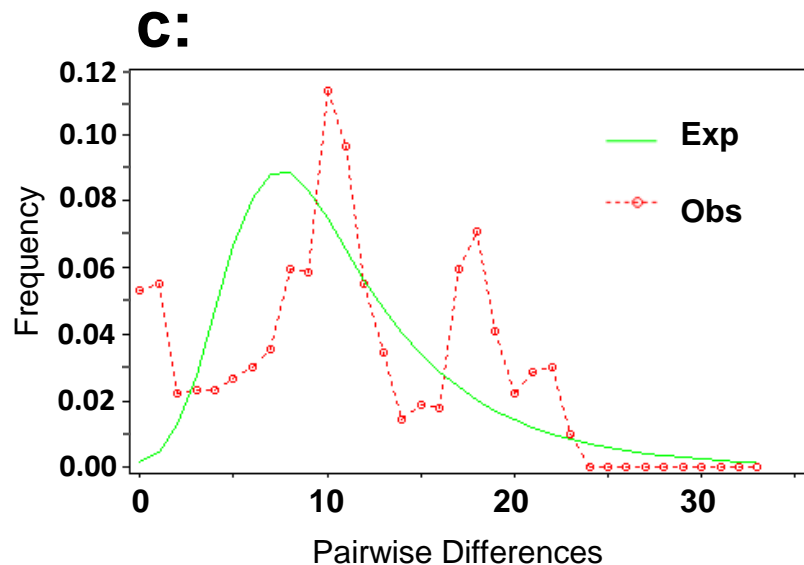

**Additional file 2: Figure S2.** Observed (Obs) and expected (Exp) mismatch distributions showing the frequencies of pairwise differences. The observed distributions (red dot lines) are compared for their goodness-of-fit to a Poisson distribution under a model of sudden expansion illustrated by the overlaid curve (green solid lines). **a**, All populations; **b**, All populations without Yunnan; and **c**, Two populations from Yunnan province.
